# Supplementary material for: The prognostic value of coronary flow reserve in patients with non- obstructive coronary artery disease and microvascular dysfunction A systematic review and meta-analysis with focus on imaging modality and sex difference
Source: Research Square preprint supplement (doi:10.21203/rs.3.rs-2789205/v1), 2023-04-11
Supplement: Supplementary file 1 [file 013928baf6148651368c8ec3.pdf]

Table 2. Characteristics of the studies comparing the prognostic value of low coronary flow reserve (CFR) in women versus men.

| <b>Study</b>                | <b>Method and number of women vs. men</b> | <b>CFR cut-off</b> | <b>Endpoints</b>                                                        | <b>Event percent in women (W) and men (M) with CFR &lt;2 vs. ≥2</b> | <b>Estimated multivariate hazard ratio (95% CI)</b> | <b>P-values for hazard ratios and interaction</b>             |
|-----------------------------|-------------------------------------------|--------------------|-------------------------------------------------------------------------|---------------------------------------------------------------------|-----------------------------------------------------|---------------------------------------------------------------|
| Cortigiani et al. 2010 [23] | Stress TTE<br>171 vs. 147                 | 2.0                | MACE (Death, MI, and revascularization)                                 | W: 27% vs. 2%<br>M: 42% and 8%                                      | W: 16.48(7.17-37.85)<br>M: 6.23(3.42-11.33)         | P<0.0001 for both gender                                      |
| Murthy et al. 2014 [20]     | PET<br>813 vs. 405                        | 2.0                | MACE (CV death, hospitalization for HF, MI, and late revascularization) | W: 5.0% and 1.6%<br>M: 6.9% and 3.2%                                | NA                                                  | W: P<0.0008<br>M: P<0.047<br>Interaction for gender<br>p=0.42 |
| Rauf et al. 2023 [30]       | Stress TTE<br>330 vs. 277                 | 2.0                | MACE (Death, hospitalization for UAP, MI, HF, and ischemic stroke)      | W: 8.5% and 3%<br>M: 16% and 5%                                     | W: 1.79 (1.12 – 2.84)<br>M: 1.79 (1.05 – 3.05)      | P<0.05 for both gender<br>Interaction for gender<br>P=0.99    |

CV=cardiovascular, HF= heart failure, MACE= major adverse cardiac event, NA=not available, PET=positron emission tomography, TTE= transthoracal echocardiography,

UAP=unstable angina pectoris.
