# Supplementary material for: The prognostic value of coronary flow reserve in patients with non- obstructive coronary artery disease and microvascular dysfunction A systematic review and meta-analysis with focus on imaging modality and sex difference
Source: Research Square preprint supplement (doi:10.21203/rs.3.rs-2789205/v1), 2023-04-11
Supplement: Supplementary file 2 [file 9195212fd2b1f74805030a28.pdf]

Table S2. Newcastle-Ottawa score of the included studies.

| Study                | Selection                                |                                    |                               |                                                              | Comparability               | Outcome    |                                    |                               | Total score |
|----------------------|------------------------------------------|------------------------------------|-------------------------------|--------------------------------------------------------------|-----------------------------|------------|------------------------------------|-------------------------------|-------------|
|                      | Representativeness of the exposed cohort | Selection of the no-exposed cohort | Ascertainment of the exposers | Demonstration that outcome was not present at start of study | Comparability of the cohort | Assessment | Adequacy of the follow-up duration | Completeness of the follow-up |             |
| Marks [15]           | *                                        | *                                  | *                             | *                                                            | **                          | *          | *                                  |                               | 8           |
| Herzog [21]          | *                                        | *                                  | *                             | *                                                            | **                          | *          | *                                  | *                             | 9           |
| Pepine [7]           | *                                        | *                                  | *                             | *                                                            | **                          | *          | *                                  | *                             | 9           |
| Contigiani-2010 [23] | *                                        | *                                  | *                             | *                                                            | **                          | *          | *                                  |                               | 8           |
| Ziadi [19]           | *                                        | *                                  | *                             | *                                                            | **                          | *          | *                                  | *                             | 9           |
| Contigiani-2012 [16] | *                                        | *                                  | *                             | *                                                            | **                          | *          | *                                  |                               | 8           |
| Lowenstein [13]      | *                                        | *                                  | *                             | *                                                            | **                          | *          | *                                  |                               | 8           |
| Murthy [20]          | *                                        | *                                  | *                             | *                                                            | **                          | *          | *                                  |                               | 8           |
| Dikic [24]           | *                                        | *                                  | *                             | *                                                            | **                          | *          | *                                  |                               | 8           |
| Gan [17]             | *                                        | *                                  | *                             | *                                                            | **                          | *          | *                                  | *                             | 9           |

|                          |   |   |   |   |    |   |   |   |   |
|--------------------------|---|---|---|---|----|---|---|---|---|
| Lee [22]                 | * | * | * | * | ** | * | * |   | 8 |
| Monroy-<br>Gonzales [14] | * | * | * | * | ** | * | * | * | 9 |
| Bajaj [27]               | * | * | * | * | ** | * | * | * | 9 |
| Toya [12]                | * | * | * | * | ** | * | * | * | 9 |
| Schroder [18]            | * | * | * | * | ** | * | * | * | 9 |
| Gaudirie [25]            | * | * | * | * | ** | * | * | * | 9 |
| Zhou [26]                | * | * | * | * | ** | * | * | * | 9 |
| Zampella [28]            | * | * | * | * | ** | * | * | * | 9 |
| Rauf                     | * | * | * | * | ** | * | * | * | 9 |
