# Supplementary material for: The prognostic value of coronary flow reserve in patients with non- obstructive coronary artery disease and microvascular dysfunction A systematic review and meta-analysis with focus on imaging modality and sex difference
Source: Research Square preprint supplement (doi:10.21203/rs.3.rs-2789205/v1), 2023-04-11
Supplement: Supplementary file 3 [file b1264692b7583aff2951221d.pdf]

Table 1. Characteristics of the included studies.

| Author and publication date according to imaging modality        | Total population and percent of men/women  | Exclusion of OCAD                                         | Type of stress agent used   | Outcomes (Death or MACE)                     | Follow-up period Mean or median (years) | CFR cut-off value |
|------------------------------------------------------------------|--------------------------------------------|-----------------------------------------------------------|-----------------------------|----------------------------------------------|-----------------------------------------|-------------------|
| <b>Stress TTE (left anterior descendance artery) (6 studies)</b> |                                            |                                                           |                             |                                              |                                         |                   |
| Contigiani et al. 2010 [23]                                      | 1660<br>45.5/54.5                          | History and positive dipyridamole test for wall motion    | Dipyridamole                | Nonfatal MI, revascularization               | 1.6                                     | 2.0               |
| Contigiani et al. 2012 [16]                                      | 3548<br>45.5/54.5                          | History and ICA with stenosis $\geq$ 50%                  | Dipyridamole                | Death                                        | 1.6                                     | 2.0               |
| Lowenstein et al. 2014 [13]                                      | 651<br>50.5/49.5                           | History and contractile or wall-motion abnormalities      | Dobutamine,<br>Dipyridamole | Cardiovascular death, MI, revascularization  | 2.9                                     | 2.0               |
| Dikic et al. 2015 [24]                                           | 200<br>45.5/54.5                           | Prior MI, revascularization, and admission for chest pain | Adenosine                   | CV death, stroke, MI, UAP, revascularization | 1.0                                     | 2.0               |
| Gan et al. 2017 [17]                                             | 371<br>47/53<br>A subgroup of 233 included | Negative Myocardial perfusion scintigraphy                | Adenosine                   | CV death, MI, revascularization              | 4.5                                     | 2.0               |

|                                                                                                |                                                   |                                   |                                                        |                                                                           |     |      |
|------------------------------------------------------------------------------------------------|---------------------------------------------------|-----------------------------------|--------------------------------------------------------|---------------------------------------------------------------------------|-----|------|
| Schroder et al. 2021 [18]                                                                      | 1681<br>0/100                                     | ICA verified stenosis $\geq 50\%$ | High-dose dipyridamole                                 | Death, MI, HF, stroke,<br>revascularization                               | 4.5 | 2.25 |
| <b>PET (8 studies) using <math>^{82}\text{Rb}</math> or <math>^{13}\text{N}</math>-ammonia</b> |                                                   |                                   |                                                        |                                                                           |     |      |
| Herzog et al. 2009 [21]                                                                        | 229<br>69/31<br>A sub-group of<br>103 included    | Stress score $\geq 4$             | Adenosine                                              | Cardiac death, nonfatal MI, cardiac<br>hospitalization, revascularization | 5.4 | 2.0  |
| Ziadi et al. 2011 [19]                                                                         | 677<br>61.5/38.5<br>A subgroup of<br>414 included | History and stress score $\geq 4$ | Dipyridamole                                           | Cardiac death, MI, cardiac<br>hospitalization, revascularization          | 1.1 | 2.0  |
| Murthy et al. 2014 [20]                                                                        | 1218<br>33/67                                     | History and stress score $\geq 3$ | Dipyridamole,<br>adenosine, regadenoson,<br>dobutamine | CV death, MI, revascularization,<br>hospitalization for HF                | 1.3 | 2.0  |
| Monroy-Gonzales et al.<br>2019 [14]                                                            | 79<br>26/74                                       | ICA or CCTA                       | Dipyridamole, adenosine                                | Death, HF hospitalization, late<br>revascularization                      | 8   | 2.0  |
| Bajaj et al. 2020 [27]                                                                         | 352 with CKD<br>63/37                             | History and stress score $> 2$    | Dipyridamole,<br>adenosine, regadenoson                | Death, MI, hospitalization for HF                                         | 4.4 | 1.5  |

|                                                   |                                   |                                                                                                                          |              |                                                                                        |     |      |
|---------------------------------------------------|-----------------------------------|--------------------------------------------------------------------------------------------------------------------------|--------------|----------------------------------------------------------------------------------------|-----|------|
| Gaudirie et al. 2021 [25]                         | 517<br>48/52 with<br>hypertension | Stress score $\geq 3$                                                                                                    | Adenosine    | Composite of cardiac death, MI,<br>revascularization, HF hospitalization               | 2.5 | 2.0  |
| Zampella [28]                                     | 311<br>60/40                      | ICA verified stenosis $\geq 50\%$                                                                                        | Adenosine    | Cardiac death, MI, late<br>revascularization                                           | 38  | 2.0  |
| Rauf et al. [30]                                  | 2175<br>50.3/49.7                 | History of IHD and signs of<br>regional ischemia defined as $\geq 5\%$<br>reversible or irreversible<br>perfusion defect | Adenosine    | MACE (Death, hospitalization for<br>UAP, MI, HF, and ischemic stroke)                  | 1.7 | 2.0  |
| <b>Stress CMR (1 study)</b>                       |                                   |                                                                                                                          |              |                                                                                        |     |      |
| Zhou et al. 2021 [26]                             | 218<br>49.5/50.5                  | Prior diagnosis of OCAD,<br>positive nonstress perfusion with<br>CMR                                                     | Adenosine    | Death, MI, progressive development<br>of epicardial CAD, stroke, HF<br>hospitalization | 5.5 | 1.5  |
| <b>Intracoronary doppler catheter (4 studies)</b> |                                   |                                                                                                                          |              |                                                                                        |     |      |
| Mark et al. 2004 [15]                             | 168<br>35/65                      | MPS and ICA                                                                                                              | Dipyridamole | Death                                                                                  | 8.5 | 3.0  |
| Lee et al. 2018 [22]                              | 631<br>70/29                      | Intracoronary catheter verified<br>high FFR $> 0.80$                                                                     | Adenosine    | Cardiac death, vessel-related<br>composite outcome (death, MI, PCI)                    | 5.0 | 2.0  |
| Pepine et al. 2010 [7]                            | 189                               | ICA verified stenosis $\geq 50\%$                                                                                        | Adenosine    | Death, MI, stroke, HF hospitalization                                                  | 5.4 | 2.32 |

|                       |               |                                            |           |       |      |     |
|-----------------------|---------------|--------------------------------------------|-----------|-------|------|-----|
|                       | 0/100         |                                            |           |       |      |     |
| Toya et al. 2021 [12] | 1692<br>34/66 | History, ICA verified stenosis<br><br>≥50% | Adenosine | Death | 11.3 | 2.5 |

CCTA=coronary computed tomography angiography, CKD=chronic kidney disease, CV=cardiovascular, FFR= fractional flow reserve, HF= heart failure, ICA=invasive coronary

angiography, MBF=myocardial blood flow, MI= myocardial infarction, MPS= myocardial perfusion scintigraphy, OCAD=obstructive coronary artery disease, PCI= percutaneous coronary

intervention, PET=positron emission tomography, TTE= transthoracal echocardiography.
