# Supplementary material for: The prognostic value of coronary flow reserve in patients with non- obstructive coronary artery disease and microvascular dysfunction A systematic review and meta-analysis with focus on imaging modality and sex difference
Source: Research Square preprint supplement (doi:10.21203/rs.3.rs-2789205/v1), 2023-04-11
Supplement: Supplementary file 4 [file cd9c67a4fbae8bb294eefc15.pdf]

**Table S1. Search strategy of electronic databases and reference screening of included and relevant review papers.**

| Database                     | Search strategy and syntaxes                                                                                                                                                                                                                                                                                                                                                                                                                                                                                                                                                                                                                                                                                                                                                                                                                                                                                                                                                                                                                                                                                                                                                                                                                                                                                                                                                                                                                                                                                                                                                                                                                                             | Number of retrieved articles.<br>Pubmed/EMBASE |
|------------------------------|--------------------------------------------------------------------------------------------------------------------------------------------------------------------------------------------------------------------------------------------------------------------------------------------------------------------------------------------------------------------------------------------------------------------------------------------------------------------------------------------------------------------------------------------------------------------------------------------------------------------------------------------------------------------------------------------------------------------------------------------------------------------------------------------------------------------------------------------------------------------------------------------------------------------------------------------------------------------------------------------------------------------------------------------------------------------------------------------------------------------------------------------------------------------------------------------------------------------------------------------------------------------------------------------------------------------------------------------------------------------------------------------------------------------------------------------------------------------------------------------------------------------------------------------------------------------------------------------------------------------------------------------------------------------------|------------------------------------------------|
| Pubmed (Medline) /<br>EMBASE | Search: (((coronary flow reserve) OR (myocardial blood flow reserve)) AND (positron emission tomography)) AND (death) Filters: English, from 2004/1/1 - 2023/3/1 Sort by: Most Recent<br>(((("coronaries"[All Fields] OR "heart"[MeSH Terms] OR "heart"[All Fields] OR "coronary"[All Fields]) AND ("flow camb"[Journal] OR "flow"[All Fields]) AND ("reserve"[All Fields] OR "reserve s"[All Fields] OR "reserves"[All Fields])) OR (("myocardially"[All Fields] OR "myocardium"[MeSH Terms] OR "myocardium"[All Fields] OR "myocardial"[All Fields]) AND ("blood circulation"[MeSH Terms] OR ("blood"[All Fields] AND "circulation"[All Fields]) OR "blood circulation"[All Fields] OR ("blood"[All Fields] AND "flow"[All Fields]) OR "blood flow"[All Fields]) AND ("reserve"[All Fields] OR "reserve s"[All Fields] OR "reserves"[All Fields]))) AND ("positron emission tomography"[MeSH Terms] OR ("positron emission"[All Fields] AND "tomography"[All Fields]) OR "positron emission tomography"[All Fields] OR ("positron"[All Fields] AND "emission"[All Fields] AND "tomography"[All Fields]) OR "positron emission tomography"[All Fields]) AND ("death"[MeSH Terms] OR "death"[All Fields] OR "deaths"[All Fields])) AND ((2004/1/1:2023/3/1[pdat]) AND (english[Filter]))                                                                                                                                                                                                                                                                                                                                                                                 | <b>95 /167</b>                                 |
|                              | Search: (((coronary flow reserve) OR (myocardial blood flow reserve)) AND (positron emission tomography)) AND (major adverse cardiac event) Filters: English, from 2004/1/1 - 2023/3/1 Sort by: Most Recent<br>(((("coronaries"[All Fields] OR "heart"[MeSH Terms] OR "heart"[All Fields] OR "coronary"[All Fields]) AND ("flow camb"[Journal] OR "flow"[All Fields]) AND ("reserve"[All Fields] OR "reserve s"[All Fields] OR "reserves"[All Fields])) OR (("myocardially"[All Fields] OR "myocardium"[MeSH Terms] OR "myocardium"[All Fields] OR "myocardial"[All Fields]) AND ("blood circulation"[MeSH Terms] OR ("blood"[All Fields] AND "circulation"[All Fields]) OR "blood circulation"[All Fields] OR ("blood"[All Fields] AND "flow"[All Fields]) OR "blood flow"[All Fields]) AND ("reserve"[All Fields] OR "reserve s"[All Fields] OR "reserves"[All Fields]))) AND ("positron emission tomography"[MeSH Terms] OR ("positron emission"[All Fields] AND "tomography"[All Fields]) OR "positron emission tomography"[All Fields] OR ("positron"[All Fields] AND "emission"[All Fields] AND "tomography"[All Fields]) OR "positron emission tomography"[All Fields]) AND (("major"[All Fields] OR "majored"[All Fields] OR "majoring"[All Fields] OR "majorities"[All Fields] OR "majority"[All Fields] OR "majors"[All Fields]) AND ("cardiovascular diseases"[MeSH Terms] OR ("cardiovascular"[All Fields] AND "diseases"[All Fields]) OR "cardiovascular diseases"[All Fields] OR ("adverse"[All Fields] AND "cardiac"[All Fields] AND "event"[All Fields]) OR "adverse cardiac event"[All Fields]))) AND ((2004/1/1:2023/3/1[pdat]) AND (english[Filter])) | <b>81/39</b>                                   |
|                              | Search: (((coronary flow reserve) OR (myocardial blood flow reserve)) AND (positron emission tomography)) AND (sex) Filters: English, from 2004/1/1 - 2023/3/1 Sort by: Most Recent                                                                                                                                                                                                                                                                                                                                                                                                                                                                                                                                                                                                                                                                                                                                                                                                                                                                                                                                                                                                                                                                                                                                                                                                                                                                                                                                                                                                                                                                                      | <b>54 /81</b>                                  |

|  |                                                                                                                                                                                                                                                                                                                                                                                                                                                                                                                                                                                                                                                                                                                                                                                                                                                                                                                                                                                                                                                                                                                                                                                                                                                                                                             |                        |
|--|-------------------------------------------------------------------------------------------------------------------------------------------------------------------------------------------------------------------------------------------------------------------------------------------------------------------------------------------------------------------------------------------------------------------------------------------------------------------------------------------------------------------------------------------------------------------------------------------------------------------------------------------------------------------------------------------------------------------------------------------------------------------------------------------------------------------------------------------------------------------------------------------------------------------------------------------------------------------------------------------------------------------------------------------------------------------------------------------------------------------------------------------------------------------------------------------------------------------------------------------------------------------------------------------------------------|------------------------|
|  | <p>(((((("coronaries"[All Fields] OR "heart"[MeSH Terms] OR "heart"[All Fields] OR "coronary"[All Fields]) AND ("flow camb"[Journal] OR "flow"[All Fields]) AND ("reserve"[All Fields] OR "reserve s"[All Fields] OR "reserves"[All Fields])) OR (("myocardially"[All Fields] OR "myocardium"[MeSH Terms] OR "myocardium"[All Fields] OR "myocardial"[All Fields]) AND ("blood circulation"[MeSH Terms] OR ("blood"[All Fields] AND "circulation"[All Fields]) OR "blood circulation"[All Fields] OR ("blood"[All Fields] AND "flow"[All Fields]) OR "blood flow"[All Fields]) AND ("reserve"[All Fields] OR "reserve s"[All Fields] OR "reserves"[All Fields]))) AND ("positron emission tomography"[MeSH Terms] OR ("positron emission"[All Fields] AND "tomography"[All Fields]) OR "positron emission tomography"[All Fields] OR ("positron"[All Fields] AND "emission"[All Fields] AND "tomography"[All Fields]) OR "positron emission tomography"[All Fields]) AND ("sex"[MeSH Terms] OR "sex"[All Fields])) AND ((2004/1/1:2023/3/1[pdat]) AND (english[Filter]))</p>                                                                                                                                                                                                                                |                        |
|  | <p>((coronary flow reserve) OR (coronary flow velocity reserve)) AND (echocardiography)) AND (death) Filters: English, MEDLINE, from 2004/1/1 - 2023/3/1<br/>       (((("coronaries"[All Fields] OR "heart"[MeSH Terms] OR "heart"[All Fields] OR "coronary"[All Fields]) AND "flow"[All Fields] AND ("reserve"[All Fields] OR "reserve s"[All Fields] OR "reserves"[All Fields])) OR (("coronaries"[All Fields] OR "heart"[MeSH Terms] OR "heart"[All Fields] OR "coronary"[All Fields]) AND "flow"[All Fields] AND ("velocities"[All Fields] OR "velocity"[All Fields]) AND ("reserve"[All Fields] OR "reserve s"[All Fields] OR "reserves"[All Fields]))) AND ("echocardiographies"[All Fields] OR "echocardiography"[MeSH Terms] OR "echocardiography"[All Fields]) AND ("death"[MeSH Terms] OR "death"[All Fields] OR "deaths"[All Fields])) AND ((medline[Filter]) AND (2004/1/1:2022/5/1[pdat]) AND (english[Filter]))</p>                                                                                                                                                                                                                                                                                                                                                                           | <p><b>118 /217</b></p> |
|  | <p>((coronary flow reserve) OR (coronary flow velocity reserve)) AND (echocardiography)) AND (major adverse cardiac event) Filters: MEDLINE, English, from 2004/1/1 - 2023/3/1<br/>       (((("coronaries"[All Fields] OR "heart"[MeSH Terms] OR "heart"[All Fields] OR "coronary"[All Fields]) AND "flow"[All Fields] AND ("reserve"[All Fields] OR "reserve s"[All Fields] OR "reserves"[All Fields])) OR (("coronaries"[All Fields] OR "heart"[MeSH Terms] OR "heart"[All Fields] OR "coronary"[All Fields]) AND "flow"[All Fields] AND ("velocities"[All Fields] OR "velocity"[All Fields]) AND ("reserve"[All Fields] OR "reserve s"[All Fields] OR "reserves"[All Fields]))) AND ("echocardiographies"[All Fields] OR "echocardiography"[MeSH Terms] OR "echocardiography"[All Fields]) AND (("major"[All Fields] OR "majored"[All Fields] OR "majoring"[All Fields] OR "majorities"[All Fields] OR "majority"[All Fields] OR "majors"[All Fields]) AND ("adverse"[All Fields] OR "adversely"[All Fields] OR "adverses"[All Fields]) AND ("cardiacs"[All Fields] OR "heart"[MeSH Terms] OR "heart"[All Fields] OR "cardiac"[All Fields]) AND ("event"[All Fields] OR "event s"[All Fields] OR "events"[All Fields]))) AND ((medline[Filter]) AND (2004/1/1:2022/5/1[pdat]) AND (english[Filter]))</p> | <p><b>94/28</b></p>    |
|  | <p>((coronary flow reserve) OR (coronary flow velocity reserve)) AND (echocardiography)) AND (sex) Filters: MEDLINE, English, from 2004/1/1 - 2023/3/1</p>                                                                                                                                                                                                                                                                                                                                                                                                                                                                                                                                                                                                                                                                                                                                                                                                                                                                                                                                                                                                                                                                                                                                                  | <p><b>100 /201</b></p> |

|  |                                                                                                                                                                                                                                                                                                                                                                                                                                                                                                                                                                                                                                                                                                                                                                                                                                                                                                                                                                                                                                                                                                                                                                                                                                                                                                                                                                                                                                                                                                               |                     |
|--|---------------------------------------------------------------------------------------------------------------------------------------------------------------------------------------------------------------------------------------------------------------------------------------------------------------------------------------------------------------------------------------------------------------------------------------------------------------------------------------------------------------------------------------------------------------------------------------------------------------------------------------------------------------------------------------------------------------------------------------------------------------------------------------------------------------------------------------------------------------------------------------------------------------------------------------------------------------------------------------------------------------------------------------------------------------------------------------------------------------------------------------------------------------------------------------------------------------------------------------------------------------------------------------------------------------------------------------------------------------------------------------------------------------------------------------------------------------------------------------------------------------|---------------------|
|  | <p>((("coronaries"[All Fields] OR "heart"[MeSH Terms] OR "heart"[All Fields] OR "coronary"[All Fields]) AND "flow"[All Fields] AND ("reserve"[All Fields] OR "reserve s"[All Fields] OR "reserves"[All Fields])) OR ((("coronaries"[All Fields] OR "heart"[MeSH Terms] OR "heart"[All Fields] OR "coronary"[All Fields]) AND "flow"[All Fields] AND ("velocities"[All Fields] OR "velocity"[All Fields]) AND ("reserve"[All Fields] OR "reserve s"[All Fields] OR "reserves"[All Fields]))) AND ("echocardiographies"[All Fields] OR "echocardiography"[MeSH Terms] OR "echocardiography"[All Fields]) AND ("sex"[MeSH Terms] OR "sex"[All Fields])) AND ((medline[Filter]) AND (2004/1/1:2022/5/1[pdat]) AND (english[Filter]))</p>                                                                                                                                                                                                                                                                                                                                                                                                                                                                                                                                                                                                                                                                                                                                                                          |                     |
|  | <p>Search: (((coronary flow reserve) OR (myocardial blood flow reserve)) AND (thermodilution)) AND (death) Filters: English, from 2004/1/1 - 2023/3/1 Sort by: Most Recent<br/>       (((("coronaries"[All Fields] OR "heart"[MeSH Terms] OR "heart"[All Fields] OR "coronary"[All Fields]) AND ("flow camb"[Journal] OR "flow"[All Fields]) AND ("reserve"[All Fields] OR "reserve s"[All Fields] OR "reserves"[All Fields])) OR (("myocardially"[All Fields] OR "myocardium"[MeSH Terms] OR "myocardium"[All Fields] OR "myocardial"[All Fields]) AND ("blood circulation"[MeSH Terms] OR ("blood"[All Fields] AND "circulation"[All Fields]) OR "blood circulation"[All Fields] OR ("blood"[All Fields] AND "flow"[All Fields]) OR "blood flow"[All Fields]) AND ("reserve"[All Fields] OR "reserve s"[All Fields] OR "reserves"[All Fields]))) AND ("thermodilution"[MeSH Terms] OR "thermodilution"[All Fields] OR "thermodilutions"[All Fields] OR "thermodilutional"[All Fields]) AND ("death"[MeSH Terms] OR "death"[All Fields] OR "deaths"[All Fields])) AND ((2004/1/1:2023/3/1[pdat]) AND (english[Filter]))</p>                                                                                                                                                                                                                                                                                                                                                                                  | <p><b>6 /18</b></p> |
|  | <p>Search: (((coronary flow reserve) OR (myocardial blood flow reserve)) AND (thermodilution)) AND (major adverse cardiac event) Filters: English, from 2004/1/1 - 2023/3/1 Sort by: Most Recent<br/>       (((("coronaries"[All Fields] OR "heart"[MeSH Terms] OR "heart"[All Fields] OR "coronary"[All Fields]) AND ("flow camb"[Journal] OR "flow"[All Fields]) AND ("reserve"[All Fields] OR "reserve s"[All Fields] OR "reserves"[All Fields])) OR (("myocardially"[All Fields] OR "myocardium"[MeSH Terms] OR "myocardium"[All Fields] OR "myocardial"[All Fields]) AND ("blood circulation"[MeSH Terms] OR ("blood"[All Fields] AND "circulation"[All Fields]) OR "blood circulation"[All Fields] OR ("blood"[All Fields] AND "flow"[All Fields]) OR "blood flow"[All Fields]) AND ("reserve"[All Fields] OR "reserve s"[All Fields] OR "reserves"[All Fields]))) AND ("thermodilution"[MeSH Terms] OR "thermodilution"[All Fields] OR "thermodilutions"[All Fields] OR "thermodilutional"[All Fields]) AND (("major"[All Fields] OR "majored"[All Fields] OR "majoring"[All Fields] OR "majorities"[All Fields] OR "majority"[All Fields] OR "majors"[All Fields]) AND ("cardiovascular diseases"[MeSH Terms] OR ("cardiovascular"[All Fields] AND "diseases"[All Fields]) OR "cardiovascular diseases"[All Fields] OR ("adverse"[All Fields] AND "cardiac"[All Fields] AND "event"[All Fields]) OR "adverse cardiac event"[All Fields])))) AND ((2004/1/1:2023/3/1[pdat]) AND (english[Filter]))</p> | <p><b>6 /9</b></p>  |

|  |                                                                                                                                                                                                                                                                                                                                                                                                                                                                                                                                                                                                                                                                                                                                                                                                                                                                                                                                                                                                                                                                                                                                                                                                                                                                                                                                                                             |                      |
|--|-----------------------------------------------------------------------------------------------------------------------------------------------------------------------------------------------------------------------------------------------------------------------------------------------------------------------------------------------------------------------------------------------------------------------------------------------------------------------------------------------------------------------------------------------------------------------------------------------------------------------------------------------------------------------------------------------------------------------------------------------------------------------------------------------------------------------------------------------------------------------------------------------------------------------------------------------------------------------------------------------------------------------------------------------------------------------------------------------------------------------------------------------------------------------------------------------------------------------------------------------------------------------------------------------------------------------------------------------------------------------------|----------------------|
|  | <p>Search: (((coronary flow reserve) OR (myocardial blood flow reserve)) AND (thermodilution)) AND (sex) Filters: English, from 2004/1/1 - 2023/3/1 Sort by: Most Recent<br/>       (((("coronaries"[All Fields] OR "heart"[MeSH Terms] OR "heart"[All Fields] OR "coronary"[All Fields]) AND ("flow camb"[Journal] OR "flow"[All Fields]) AND ("reserve"[All Fields] OR "reserve s"[All Fields] OR "reserves"[All Fields])) OR (("myocardially"[All Fields] OR "myocardium"[MeSH Terms] OR "myocardium"[All Fields] OR "myocardial"[All Fields]) AND ("blood circulation"[MeSH Terms] OR ("blood"[All Fields] AND "circulation"[All Fields]) OR "blood circulation"[All Fields] OR ("blood"[All Fields] AND "flow"[All Fields]) OR "blood flow"[All Fields]) AND ("reserve"[All Fields] OR "reserve s"[All Fields] OR "reserves"[All Fields])))) AND ("thermodilution"[MeSH Terms] OR "thermodilution"[All Fields] OR "thermodilutions"[All Fields] OR "thermodilutional"[All Fields]) AND ("sex"[MeSH Terms] OR "sex"[All Fields])) AND ((2004/1/1:2023/3/1[pdat]) AND (english[Filter]))</p>                                                                                                                                                                                                                                                                             | <p><b>5 /10</b></p>  |
|  | <p>Search: (((coronary flow reserve) OR (myocardial blood flow reserve)) AND (magnetic resonance)) AND (death) Filters: English, from 2004/1/1 - 2023/3/1 Sort by: Most Recent<br/>       (((("coronaries"[All Fields] OR "heart"[MeSH Terms] OR "heart"[All Fields] OR "coronary"[All Fields]) AND ("flow camb"[Journal] OR "flow"[All Fields]) AND ("reserve"[All Fields] OR "reserve s"[All Fields] OR "reserves"[All Fields])) OR (("myocardially"[All Fields] OR "myocardium"[MeSH Terms] OR "myocardium"[All Fields] OR "myocardial"[All Fields]) AND ("blood circulation"[MeSH Terms] OR ("blood"[All Fields] AND "circulation"[All Fields]) OR "blood circulation"[All Fields] OR ("blood"[All Fields] AND "flow"[All Fields]) OR "blood flow"[All Fields]) AND ("reserve"[All Fields] OR "reserve s"[All Fields] OR "reserves"[All Fields])))) AND ("magnetic resonance spectroscopy"[MeSH Terms] OR ("magnetic"[All Fields] AND "resonance"[All Fields] AND "spectroscopy"[All Fields]) OR "magnetic resonance spectroscopy"[All Fields] OR ("magnetic"[All Fields] AND "resonance"[All Fields]) OR "magnetic resonance"[All Fields]) AND ("death"[MeSH Terms] OR "death"[All Fields] OR "deaths"[All Fields])) AND ((2004/1/1:2023/3/1[pdat]) AND (english[Filter]))</p>                                                                                         | <p><b>48 /88</b></p> |
|  | <p>Search: (((coronary flow reserve) OR (myocardial blood flow reserve)) AND (magnetic resonance)) AND (major adverse cardiac event) Filters: English, from 2004/1/1 - 2023/3/1 Sort by: Most Recent<br/>       (((("coronaries"[All Fields] OR "heart"[MeSH Terms] OR "heart"[All Fields] OR "coronary"[All Fields]) AND ("flow camb"[Journal] OR "flow"[All Fields]) AND ("reserve"[All Fields] OR "reserve s"[All Fields] OR "reserves"[All Fields])) OR (("myocardially"[All Fields] OR "myocardium"[MeSH Terms] OR "myocardium"[All Fields] OR "myocardial"[All Fields]) AND ("blood circulation"[MeSH Terms] OR ("blood"[All Fields] AND "circulation"[All Fields]) OR "blood circulation"[All Fields] OR ("blood"[All Fields] AND "flow"[All Fields]) OR "blood flow"[All Fields]) AND ("reserve"[All Fields] OR "reserve s"[All Fields] OR "reserves"[All Fields])))) AND ("magnetic resonance spectroscopy"[MeSH Terms] OR ("magnetic"[All Fields] AND "resonance"[All Fields] AND "spectroscopy"[All Fields]) OR "magnetic resonance spectroscopy"[All Fields] OR ("magnetic"[All Fields] AND "resonance"[All Fields]) OR "magnetic resonance"[All Fields]) AND ("major adverse cardiac event"[MeSH Terms] OR "major adverse cardiac event"[All Fields] OR "major adverse cardiac events"[All Fields])) AND ((2004/1/1:2023/3/1[pdat]) AND (english[Filter]))</p> | <p><b>62 /33</b></p> |

|                                                                                   |                                                                                                                                                                                                                                                                                                                                                                                                                                                                                                                                                                                                                                                                                                                                                                                                                                                                                                                                                                                                                                                                                                                                                                                                                                     |                 |
|-----------------------------------------------------------------------------------|-------------------------------------------------------------------------------------------------------------------------------------------------------------------------------------------------------------------------------------------------------------------------------------------------------------------------------------------------------------------------------------------------------------------------------------------------------------------------------------------------------------------------------------------------------------------------------------------------------------------------------------------------------------------------------------------------------------------------------------------------------------------------------------------------------------------------------------------------------------------------------------------------------------------------------------------------------------------------------------------------------------------------------------------------------------------------------------------------------------------------------------------------------------------------------------------------------------------------------------|-----------------|
|                                                                                   | "magnetic resonance"[All Fields]) AND (("major"[All Fields] OR "majored"[All Fields] OR "majoring"[All Fields] OR "majorities"[All Fields] OR "majority"[All Fields] OR "majors"[All Fields]) AND ("cardiovascular diseases"[MeSH Terms] OR ("cardiovascular"[All Fields] AND "diseases"[All Fields]) OR "cardiovascular diseases"[All Fields] OR ("adverse"[All Fields] AND "cardiac"[All Fields] AND "event"[All Fields]) OR "adverse cardiac event"[All Fields])) AND ((2004/1/1:2023/3/1[pdat]) AND (english[Filter]))                                                                                                                                                                                                                                                                                                                                                                                                                                                                                                                                                                                                                                                                                                          |                 |
|                                                                                   | Search: (((coronary flow reserve) OR (myocardial blood flow reserve)) AND (magnetic resonance)) AND (sex) Filters: English, from 2004/1/1 - 2023/3/1 Sort by: Most Recent (((("coronaries"[All Fields] OR "heart"[MeSH Terms] OR "heart"[All Fields] OR "coronary"[All Fields]) AND ("flow camb"[Journal] OR "flow"[All Fields]) AND ("reserve"[All Fields] OR "reserve s"[All Fields] OR "reserves"[All Fields])) OR (("myocardially"[All Fields] OR "myocardium"[MeSH Terms] OR "myocardium"[All Fields] OR "myocardial"[All Fields]) AND ("blood circulation"[MeSH Terms] OR ("blood"[All Fields] AND "circulation"[All Fields]) OR "blood circulation"[All Fields] OR ("blood"[All Fields] AND "flow"[All Fields]) OR "blood flow"[All Fields]) AND ("reserve"[All Fields] OR "reserve s"[All Fields] OR "reserves"[All Fields])))) AND ("magnetic resonance spectroscopy"[MeSH Terms] OR ("magnetic"[All Fields] AND "resonance"[All Fields] AND "spectroscopy"[All Fields]) OR "magnetic resonance spectroscopy"[All Fields] OR ("magnetic"[All Fields] AND "resonance"[All Fields]) OR "magnetic resonance"[All Fields]) AND ("sex"[MeSH Terms] OR "sex"[All Fields])) AND ((2004/1/1:2023/3/1[pdat]) AND (english[Filter])) | <b>22 /50</b>   |
| <b>Total results of Pubmed/EMBASE</b>                                             |                                                                                                                                                                                                                                                                                                                                                                                                                                                                                                                                                                                                                                                                                                                                                                                                                                                                                                                                                                                                                                                                                                                                                                                                                                     | <b>691 /941</b> |
| <b>Total results of all electronic search</b>                                     |                                                                                                                                                                                                                                                                                                                                                                                                                                                                                                                                                                                                                                                                                                                                                                                                                                                                                                                                                                                                                                                                                                                                                                                                                                     | <b>1632</b>     |
| <b>Total results of manual reference screening of eligible papers and reviews</b> |                                                                                                                                                                                                                                                                                                                                                                                                                                                                                                                                                                                                                                                                                                                                                                                                                                                                                                                                                                                                                                                                                                                                                                                                                                     | <b>426</b>      |
| <b>Total results of all searches</b>                                              |                                                                                                                                                                                                                                                                                                                                                                                                                                                                                                                                                                                                                                                                                                                                                                                                                                                                                                                                                                                                                                                                                                                                                                                                                                     | <b>2058</b>     |
| <b>Duplicates</b>                                                                 |                                                                                                                                                                                                                                                                                                                                                                                                                                                                                                                                                                                                                                                                                                                                                                                                                                                                                                                                                                                                                                                                                                                                                                                                                                     | <b>814</b>      |
| <b>Number of retrieved results for evaluation.</b>                                |                                                                                                                                                                                                                                                                                                                                                                                                                                                                                                                                                                                                                                                                                                                                                                                                                                                                                                                                                                                                                                                                                                                                                                                                                                     | <b>1244</b>     |
