# Supplementary material for: The prognostic value of coronary flow reserve in patients with non- obstructive coronary artery disease and microvascular dysfunction A systematic review and meta-analysis with focus on imaging modality and sex difference
Source: Research Square preprint supplement (doi:10.21203/rs.3.rs-2789205/v1), 2023-04-11
Supplement: Supplementary file 5 [file d670922f39c003bd6cde48a1.pdf]

Table.3. Pooled analysis of the baseline differences between low and normal coronary flow reserve (CFR). The values are presented either as means with standard deviations or absolute numbers with percent.

| Variable      | Number of studies providing data | Low CFR            | Normal CFR           | P-value for difference |
|---------------|----------------------------------|--------------------|----------------------|------------------------|
| Age (years)   | 9                                | 63.3±9.7           | 59.4±9.8             | <0.001                 |
| Sex (male)    | 8                                | 1453/2873<br>(50%) | 3646/7095<br>(51%)   | 0.55                   |
| Hypertension  | 10                               | 2394/3670<br>(65%) | 4458/8168<br>(54.5%) | <0.001                 |
| Diabetes      | 10                               | 885/3670<br>(24%)  | 1233/6600<br>(18.5%) | <0.001                 |
| Dyslipidaemia | 8                                | 2133/3536<br>(60%) | 4318/7945<br>(54.5%) | <0.001                 |
