# Supplementary figures and images for: The prognostic value of coronary flow reserve in patients with non- obstructive coronary artery disease and microvascular dysfunction A systematic review and meta-analysis with focus on imaging modality and sex difference
Source: Research Square preprint supplement (doi:10.21203/rs.3.rs-2789205/v1), 2023-04-11

Funnel plot with pseudo 95% confidence limits

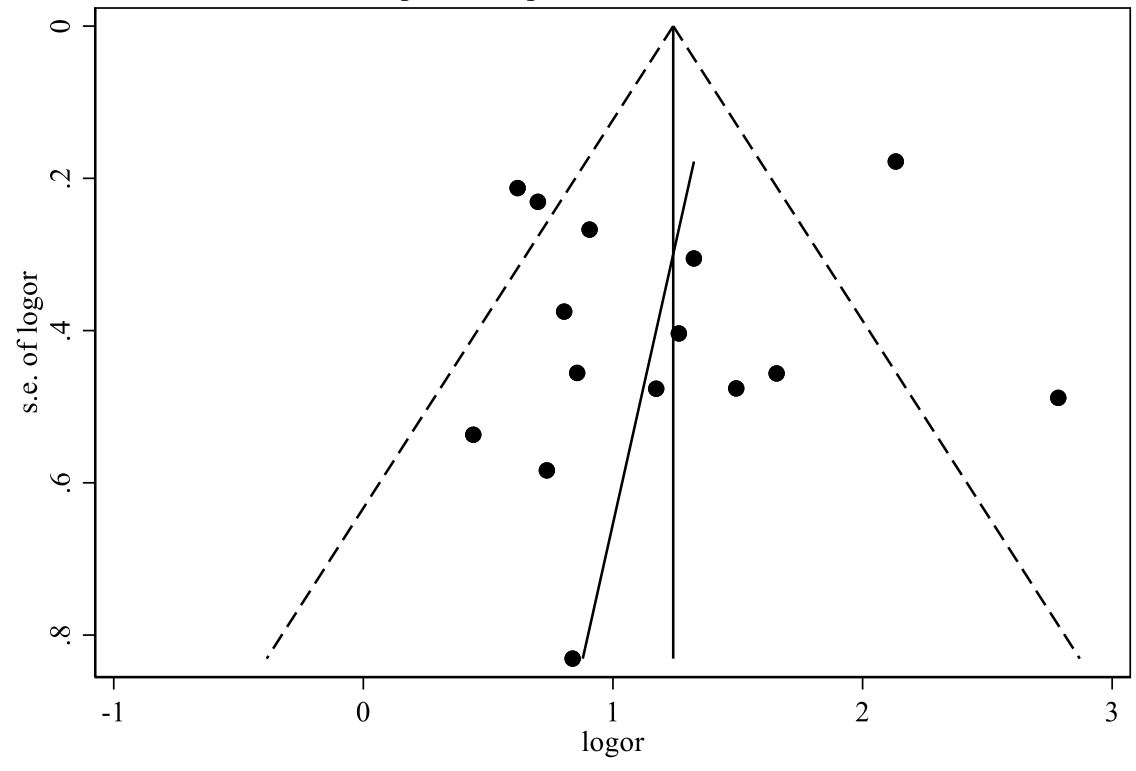

Supplement: Supplementary file 6 [file fc74b8f1591110cb86f14e87.pdf]
